# Supplementary material for: Expanding Epigenomics to Archived FFPE Tissues: An Evaluation of DNA Repair Methodologies
Source: Oxford University Press journal article supplement (doi:10.1158/1055-9965.epi-14-0464), 2014-12-01
Supplement: 10559965epi140464-sup-130679_1_supp_2536944_n7s8tj.docx [file 10559965epi140464-sup-130679_1_supp_2536944_n7s8tj.docx]

***Expanding epigenomics to archived FFPE tissues: An evaluation of DNA repair methodologies*** *Siegel, EM et al*

| **Supplementary Table 2.** The number and overlap of discordant loci (|Δβ|>0.3) across internal replicates and by DNA starting material for the Restore and REPLI-g Ligase methods for each patient sample. | | | | | | | | |
| --- | --- | --- | --- | --- | --- | --- | --- | --- |
| Experiment | Discordant loci between Replicate pairs1 | | | | Overlap of discordant loci2 | | | |
|  | A | B | C | Total | A&B | A&C | B&C | A&B&C |
| **Replicates** |  |  |  |  |  |  |  |  |
| RES2 vs RES3 | 147 | 182 | 17 | 346 | 2 | 1 | 2 | 0 |
| LIG2 vs LIG1 | 8,016 | 4,618 | 84 | 12,718 | 248 | 3 | 5 | 0 |
| **DNA Starting amount for RES** |  |  |  |  |  |  |  |  |
| RES1 vs RES2 | 80 | 131 | 19 | 230 | 1 | 1 | 0 | 0 |
| RES1 vs RES3 | 123 | 87 | 19 | 229 | 2 | 1 | 0 | 0 |

1. The number of discordant CpG-loci defined as |Δβ|>0.3 between replicates or by DNA amount.
2. Overlap of individual discordant CpG-loci (|Δβ|>0.3) across patient samples (A, B and C), pairwise and overall.
